# Supplementary material
Source: Springer Nature journal article supplement (https://www.springermedizin.de/resource/supplementary/12891_2009_849_MOESM2_ESM.pdf/9506550)
Supplement: MOESM2 [file 9506550]

Has this knee had a further operation?

Yes \_\_\_\_\_

No \_\_\_\_\_

Please give details.

Do you get pain in this knee?

While walking

At rest

Yes \_\_\_\_\_ (30)

\_\_\_\_\_ (0)

No \_\_\_\_\_ (50)

Can you bend your knee to 90°?

Less than 90° \_\_\_\_\_ (11)

90° \_\_\_\_\_

(18) Greater than 90° \_\_\_\_\_ (25)

Does your knee feel stable?

Yes \_\_\_\_\_ (25)

No \_\_\_\_\_ (0)

Does your knee completely straighten?

Yes \_\_\_\_\_ (0)

No \_\_\_\_\_ (2)

TOTAL PAIN

How far can you walk?

Unlimited \_\_\_\_\_ (50)

5 to 10 blocks \_\_\_\_\_ (30)

1 to 5 blocks \_\_\_\_\_ (20)

Less than 1 block \_\_\_\_\_ (10)

Can't walk \_\_\_\_\_ (0)

Can you walk upstairs?

Yes \_\_\_\_\_ (50)

No \_\_\_\_\_ (0)

With support \_\_\_\_\_ (30)

Do you use a stick, crutch or frame?

One stick \_\_\_\_\_ (5)

One crutch \_\_\_\_\_ (5)

2 crutches or frame \_\_\_\_\_ (20)

TOTAL FUNCTION
